# Supplementary material for: Effects of codon optimization on coagulation factor IX translation and structure: Implications for protein and gene therapies
Source: PubMed Central journal article supplement (PMC6820528; doi:10.1038/s41598-019-51984-2), 2019-10-29
Supplement: 41598_2019_51984_MOESM1_ESM.pdf [file 41598_2019_51984_MOESM1_ESM.pdf]

## Effects of codon optimization on coagulation factor IX translation and structure:

### Implications for protein and gene therapies

Aikaterini Alexaki<sup>aa</sup>, Gaya K. Hettiarachchi<sup>aa\*</sup>, John C. Athey<sup>a</sup>, Upendra K. Katneni<sup>a</sup>, Vijaya Simhadri<sup>a</sup>, Nobuko Hamasaki-Katagiri<sup>a</sup>, Puja Nanavaty<sup>b</sup>, Brian Lin<sup>a</sup>, Kazuyo Takeda<sup>a</sup>, Darón Freedberg<sup>a</sup>, Dougald Monroe<sup>c</sup>, Joseph R. McGill<sup>a</sup>, Robert Peters<sup>d</sup>, Jacob M. Kames<sup>a</sup>, David D. Holcomb<sup>a</sup>, Ryan C. Hunt<sup>a</sup>, Zuben E. Sauna<sup>a</sup>, Amy Gelinias<sup>e</sup>, Nebojsa Janjic<sup>e</sup>, Michael DiCuccio<sup>f</sup>, Haim Bar<sup>g</sup>, Anton A. Komar<sup>b</sup>, and Chava Kimchi-Sarfaty<sup>a</sup>

<sup>a</sup> Center for Biologics Evaluation and Research, Food and Drug Administration, Silver Spring, MD, USA

<sup>b</sup> Center for Gene Regulation in Health and Disease, Cleveland State University, Cleveland, OH, USA

<sup>c</sup> University of North Carolina at Chapel hill, Chapel hill, NC, USA

<sup>d</sup> Bioverativ, Cambridge, MA, USA

<sup>e</sup> SomaLogic, Inc., Boulder, CO, USA

<sup>f</sup> National Center of Biotechnology Information, National Institutes of Health, Bethesda, MD, USA

<sup>g</sup> Department of Statistics, University of Connecticut, Storrs, CT, USA

Corresponding author:

[Chava.kimchi-sarfaty@fda.hhs.gov](mailto:Chava.kimchi-sarfaty@fda.hhs.gov); Division of Plasma Protein Therapeutics, Office of Tissue and Advanced Therapies, Center for Biologics Evaluation and Research, Food and Drug Administration, Silver Spring, USA

\*Authors AA and GKH contributed equally

**Supplemental Figure S1. Comparison of the nucleotide sequences of codon-optimized and wild type *F9* variants.** Nucleotide changes between the two sequences are indicated in red, while codon changes are highlighted in yellow.

|    |     |                                                      |    |      |                                                      |      |
|----|-----|------------------------------------------------------|----|------|------------------------------------------------------|------|
| CO | 1   | ATGCAGAGAGTCAACAATGATATGGCTGAGTCACTGGGCTGATTACTAT    | CO | 749  | CAITTTGGGGGAGGCTCTATCGTAAATGAGAAATGGATTGTACCGCCGCT   | 798  |
| WT | 1   | ATGCAGCGGTGAACAATGATATGGCGAGATCAACCAGGCTCATCAACAT    | WT | 749  | CAITTTGGGGGAGGCTCTATCGTAAATGAGAAATGGATTGTACCGGCTGCGC | 798  |
|    |     | M Q R V N M I M A E S P G L I T I                    |    |      | F C G G S I V N E K W I V T A A                      |      |
| CO | 51  | GTCCCTGCTGGGCTACTGCTGTCCCGCGAGTGTACCGGTTCCTGGGA      | CO | 799  | CACGTGGTGGAAACCGGAGTCAASATCACAGTGTGCTGCTGGGAGCACAA   | 848  |
| WT | 51  | GTCCCTTTTAGGATATCTACTACAGTGTGCTGAAATGTACAGTITTTCTTGA | WT | 799  | CACGTGTTTGAACCTGGTGTAAAAATACAGTITGTCGCAAGGTGAACATAA  | 848  |
|    |     | C L L G Y L L S A E C T V F L D                      |    |      | H C V E T G V K I T V V A G E H N                    |      |
| CO | 99  | TCATGAGAACGCRAAATAAGATCTGAAACAGGCCAAAGATATAATAGTG    | CO | 849  | CAITGAGGAAACAGACATACTGAGCAGAAAGCGAATGTGATCCGCATTA    | 898  |
| WT | 99  | TCATGAAACGCCRAAATAATCTGAAATCGGCCAAAGAGTATAATTCAG     | WT | 849  | TAITGAGGASACAGACATACTAGAGCAAAGCGAATGTGATTCGAAATTA    | 898  |
|    |     | H E N A N K I L N R P K R Y N S G                    |    |      | I E E T E H T E Q K R N V I R I I                    |      |
| CO | 149 | GGAACTGGAGGAAATTTGTGACGGGCAACCTGGAGAGAGATGCATGGAG    | CO | 899  | TTCCACACCACTAACTACAATGCAGCCATCAACAATAATAATCATGACATT  | 948  |
| WT | 149 | GTAAATGGAGAGATTTGTCAAGGGAACCTGGAGAGAGATGTATGGAA      | WT | 899  | TTCCACCCCAACTACAATGCAGCTATTAATAAGTACAAACATGACATT     | 948  |
|    |     | K L E E F V Q G N L E R E C M E                      |    |      | P H H N Y N A A I N K Y N H D I                      |      |
| CO | 199 | GAAAAGTGTAGCTTCGAGGAAAGCCGCGAGAGTGTITGAAAATACAGAGCG  | CO | 949  | GCCCTGCTGGAACTGGATGAGCCCTCTGGTGTCTAACAGCTACCTCACTCC  | 998  |
| WT | 199 | GAAAAGTGTAGTITTTGAGGAAAGCCAGGAGAGTITTTGAAAACACTGAGAG | WT | 949  | GCCCTTCGGAACCTGGAGAACCTTATGTGCTAACAGCTACCTTACACC     | 998  |
|    |     | E K C S F E E A R E V F E N T E R                    |    |      | A L L E L D E P L V L N S Y V T P                    |      |
| CO | 249 | AACCACAGAGTITGGAAAGCAGTATGTGGACGGGATCAGTGCAGAGCA     | CO | 999  | AATCTGCATTGCTGCACAAAGAGTATACCAAATCTTCCCTGAAGTITGGAT  | 1048 |
| WT | 249 | AACAACAGAAATITGGAAAGCAGTATGTGATGGAGATCAGTGTGATCCA    | WT | 999  | TAITTGCAATGCTGCACAAAGAGTATACCAAATCTTCCCTGAATITGGAT   | 1048 |
|    |     | T T E F W K Q Y V D G D Q C E S N                    |    |      | I C I A D K E Y T N I F L K F G S                    |      |
| CO | 299 | ACCCCTGTCTTAATGGCCGAGTGTGCAAGAAGATCAACTCATAAGAA      | CO | 1049 | CAGGTAAGTGGAGCGGCTGGGGAAAGAGTCTTCCCAAGGGCAGGAGC-TC   | 1097 |
| WT | 299 | ATCCAAGTITTAATGGCCGAGTGTGCAAGGATGACATTAATTCCTATGAA   | WT | 1049 | CTGGTAAGTGGAGCGGCTGGGGAAAGAGTCTTCCCAAAAGGGA-GATCAGC  | 1097 |
|    |     | P C L N G G S C K D D I N S Y E                      |    |      | G Y V S G W G R V F H K G R S A                      |      |
| CO | 349 | TGTGGTGTCCCTTCGGTITGAAAGCAAAATTCGAGCTGGAAGTGTAC      | CO | 1098 | CCTGGTGTCCAGTATCTCGAGTGGCTCTGGTGTATCGAGCTACCTGTCT    | 1147 |
| WT | 349 | TGTGGTGTCCCTTTGGTITGAAAGCAAAAGTGTGAAATGATGATGAC      | WT | 1098 | TTTAGTGTCCAGTATCTTAGAGTTCCTCTGTGTGATCGAGCCACTGTCT    | 1147 |
|    |     | C W C P F G Y L E G K N C E L D V T                  |    |      | L V L Q Y L R V P L V D R A T C L                    |      |
| CO | 399 | ATGTAACATTAAGAATGGACGTGCGAGCAGTITTTGAAAACTCTGCCG     | CO | 1148 | TGAGTCTTACCAAGTITTACATCTAACAAACATGTTCTGGCTGGGTTT     | 1197 |
| WT | 399 | ATGTAACATTAAGAATGGCAGTGTGCGAGCAGTITTTGAAAAATAGTGTCTG | WT | 1148 | TTCGATCTTACCAAGTITTACATCTAACAAACATGTTCTGGCTGGGTTT    | 1197 |
|    |     | C N I K N G R C E Q F C K N S A D                    |    |      | R S T K F T I Y N N M F C A G F                      |      |
| CO | 449 | ATAAATAGGTGGTGTGCAAGCTGTACTGAAAGATATCGCCTGGCTGAGAAC  | CO | 1198 | CAAGAGGGAGGAGAGATCTGTGTCAGGGGATTTCTGGGGGCCACATGT     | 1247 |
| WT | 449 | ATAAATAGGTGGTITGCTCCCTGTACTGAGGGATATCGACTGCAGAAAC    | WT | 1198 | CATGAGGGAGGTAGAGATCTGTGTCAGGGAGATAGTGGGGGACCCCATGT   | 1247 |
|    |     | N K V V C S C T E G Y R L A E N                      |    |      | H E G G R D S C Q G D S G G P H V                    |      |
| CO | 499 | CAGAAGTCTCTGGAACCCAGCAGTCCCTTCCCTGTGGGAGGTGAGCGT     | CO | 1248 | GACAGAGGTGAAAGGACCAGTTCCTGACTGGCATATTTCCTGGGGAG      | 1297 |
| WT | 499 | CAGAAGTCTGTGAAACCCAGCAGTCCCTTCCCTGTGGAGAGTITCTGTG    | WT | 1248 | TACTGAAAGTGAAGGACCAGTTCCTGACTGGCAATATTAGCTGGGGTG     | 1297 |
|    |     | Q K S C E P A V P F P C G R V S V                    |    |      | T E V E G T S F L T G I I S W G E                    |      |
| CO | 549 | CTCCAGACTTCAAACTGACAGAGCAGAGACAGTITTTCCCGACTGG       | CO | 1298 | AGGAAATGTGCAATGAAGGGAATAACGGGATCTACACCAAGTGAAGCGC    | 1347 |
| WT | 549 | ITCACAACTTCTAAGCTGACCGTGTGAGACTGTITTTCCCTGATGTGG     | WT | 1298 | AAGAAATGTGCAATGAAGGCAATAATGGAAATATATACCAAGTATCCCGG   | 1347 |
|    |     | S Q T S K L T R A E T V F P D V D                    |    |      | E C A M K G K Y G I Y T K V S R                      |      |
| CO | 599 | ATTACGTCAACAGCACTGAGGCCGAAACCATCTGGCAACATTACTCAG     | CO | 1348 | TATGTAACTGGATCAAGGAAAAAACCAACTGACC                   | 1383 |
| WT | 599 | ACTAATGTAATTTCTACTGAAAGCTGAAACCATTTTGGATAACATCACTCAA | WT | 1348 | TATGTAACTGGATTAAAGAAAAAACCAAGCTCACT                  | 1383 |
|    |     | Y V N S T E A E T I L D N I T Q                      |    |      | Y V N W I K E K T K L T                              |      |
| CO | 649 | TCTACCCAGAGTITCAATGACTTACTCGGGTGGTGGGGGGAGGATGCG     | CO | 649  | AGGACCCAAAGCAITTAATGACTTACTCGGGTITGTTGGTGGAGAGATGCG  |      |
| WT | 649 | AGGACCCAAAGCAITTAATGACTTACTCGGGTITGTTGGTGGAGAGATGCG  | WT | 649  | S T Q S F N D F T R V V G G E D A                    |      |
|    |     | S T Q S F N D F T R V V G G E D A                    |    |      |                                                      |      |
| CO | 699 | TAAACCAAGCCAGTTCGCCCTGGCAGTGGTCTGAAAGGAAAGGTGATG     | CO | 699  | TAAACCAAGCCAGTTCGCCCTGGCAGTGGTCTGAAAGGAAAGGTGATG     |      |
| WT | 699 | CAAACCAAGGTCAAATCCCTTGGCAGTGGTCTGAAAGGAAAGGTGATG     | WT | 699  | CAAACCAAGGTCAAATCCCTTGGCAGTGGTCTGAAAGGAAAGGTGATG     |      |
|    |     | K P G Q F P W Q V V L N G K V D A                    |    |      |                                                      |      |

**Supplemental Figure S2. In silico analyses of mRNA folding and stability for the WT and CO F9 coding sequence.** Predicted MFE values and structures are shown for 37°C based on NUPACK algorithm ([www.nupack.org](http://www.nupack.org))

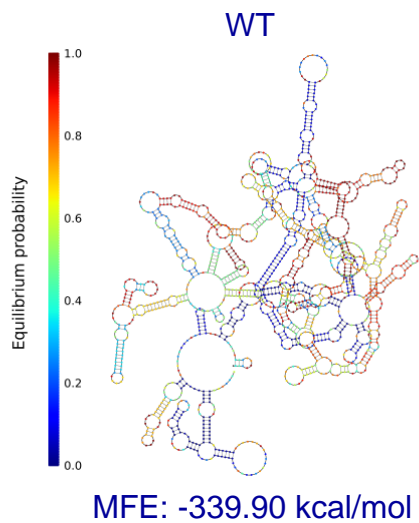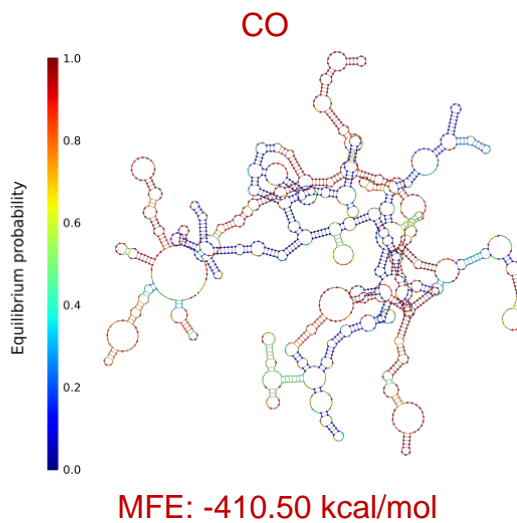

**Supplemental Figure S3. FIX expression is higher in HEK293T cells stably transfected with wild-type vs. codon-optimized F9.** Cell supernatant (concentrated medium) and lysate was collected and analyzed by immunoblotting. Membranes were stained with anti-V5 or anti-GAPDH. Multiple exposures of film are shown to demonstrate FIX (top image) and GAPDH (bottom image) at appropriate contrast. In the medium lanes, 5  $\mu$ g of protein were loaded per lane. In the lysate lanes, 10  $\mu$ g of protein were loaded per lane. Portions of these images were used to create Figure 2b.

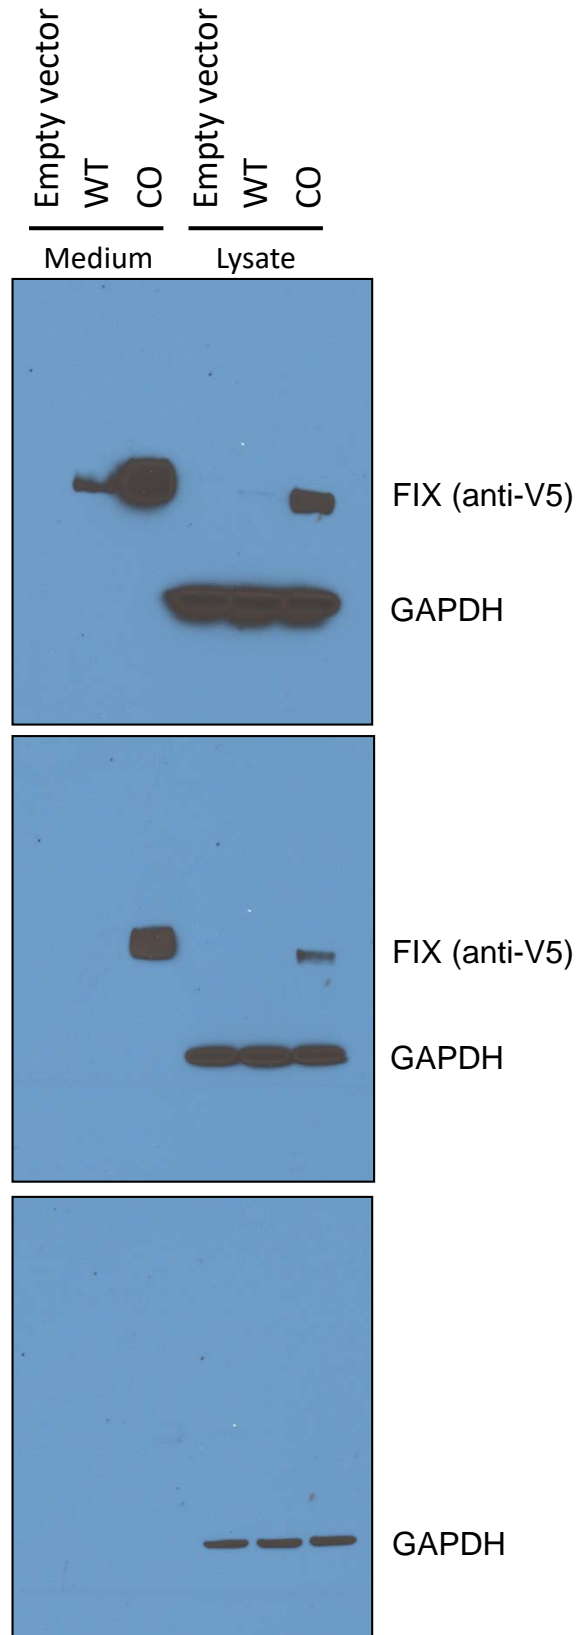

**Supplemental Figure S4.** RPF densities along the WT and CO *F9* mRNA for three replicates show reproducibility of results.

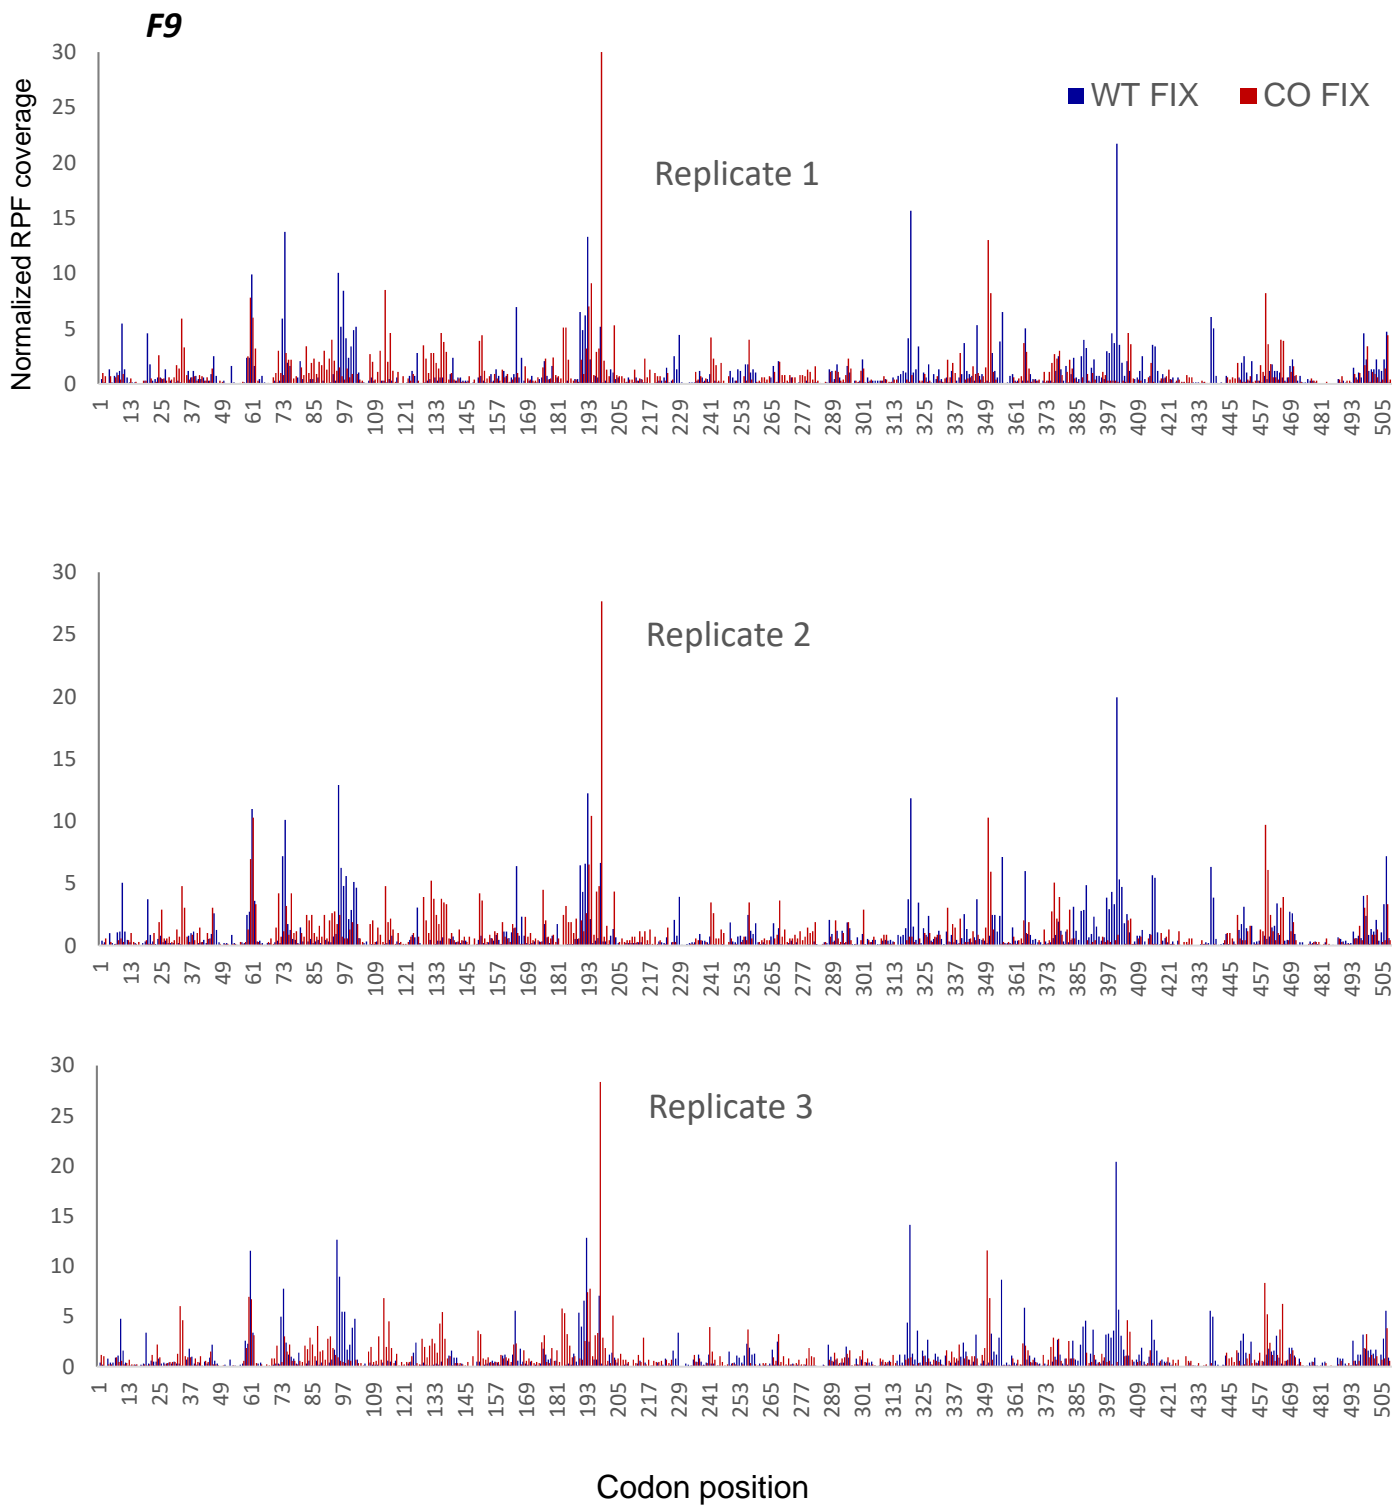

**Supplemental Figure S5. *GAPDH* is translated with very similar kinetics in the wild type and codon-optimized expressing cell lines.** RPF densities along the *GAPDH* mRNA are shown as average of 3 experiments and in each individual ribosome profiling experiment.

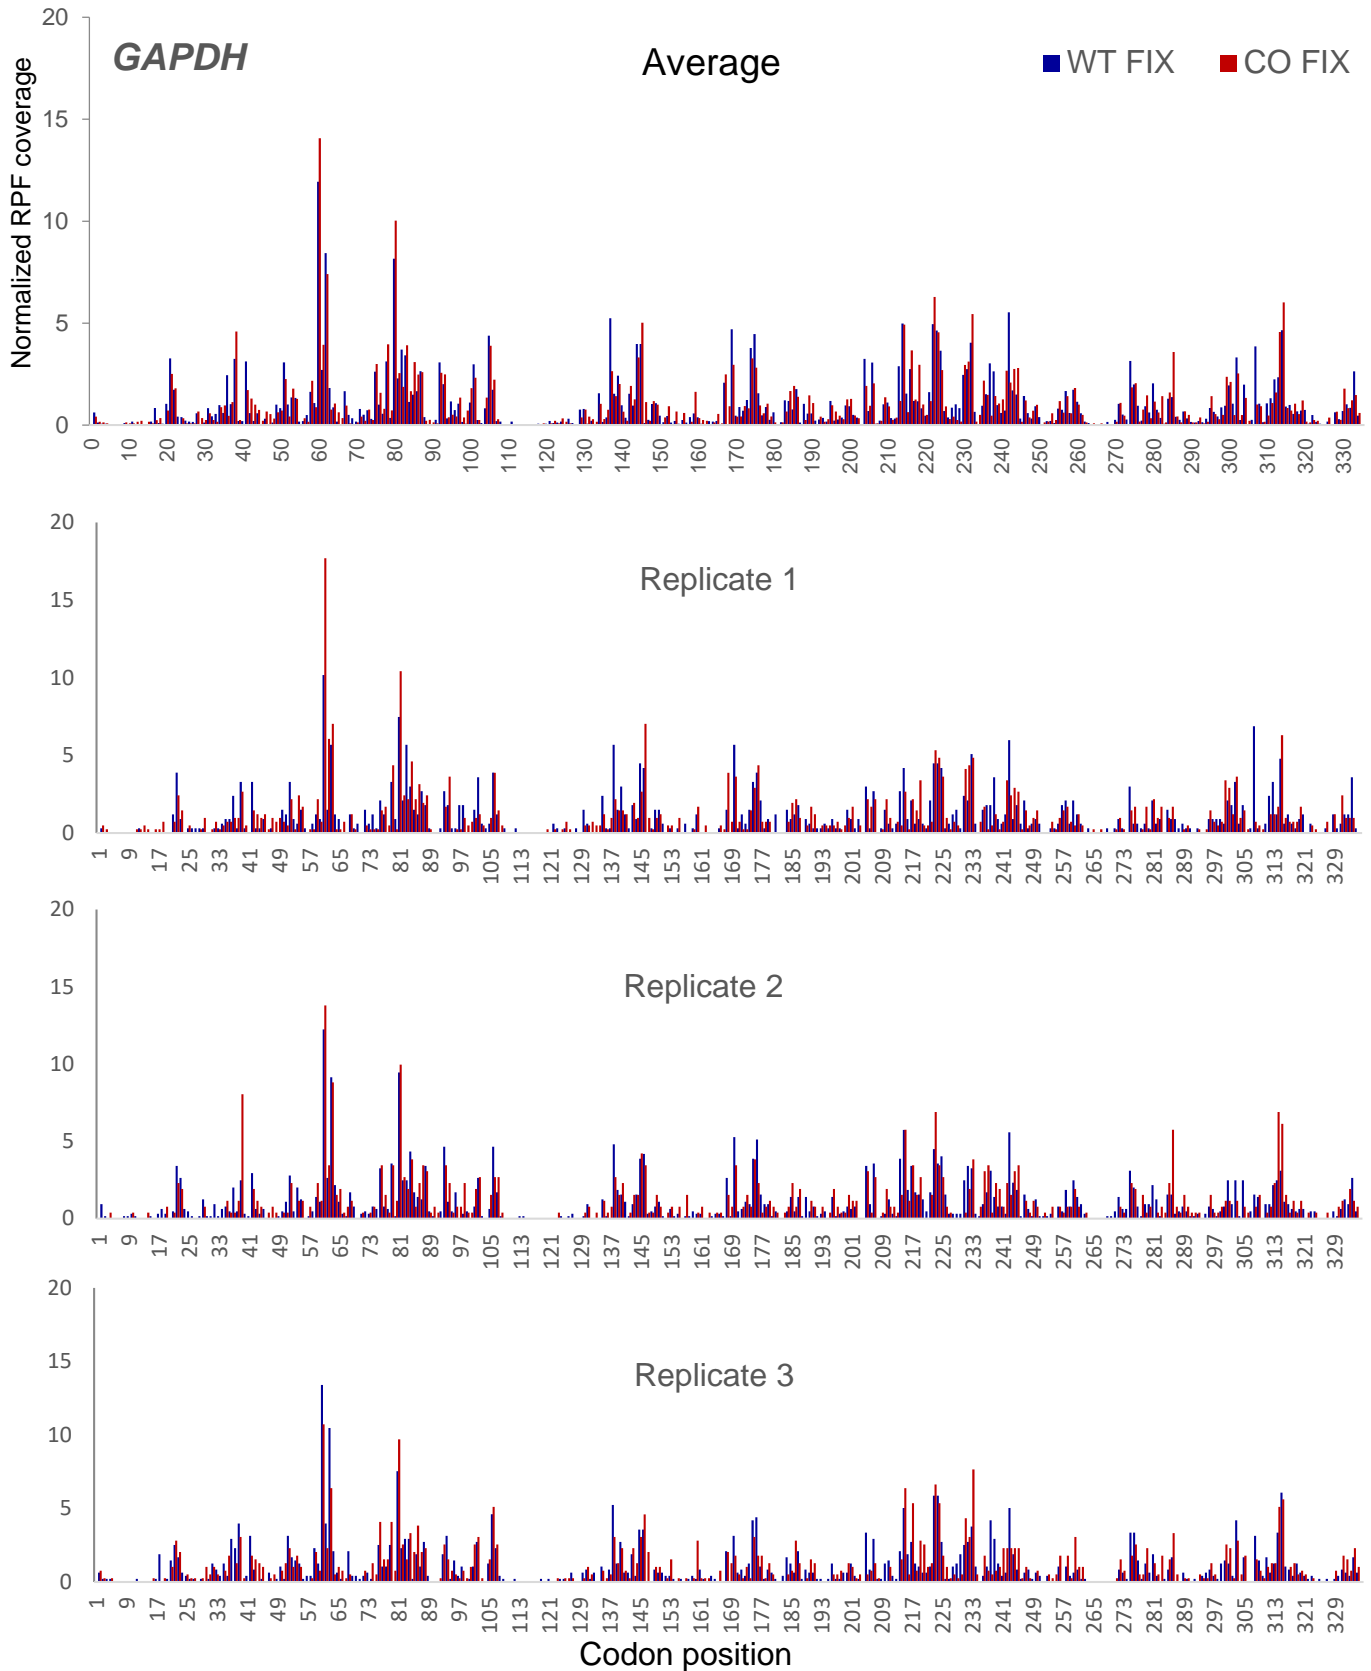

**Supplemental Figure S6. *ACTB* is translated with very similar kinetics in the wild type and codon-optimized expressing cell lines.** RPF densities along the *ACTB* mRNA are shown as average of 3 experiments and in each individual ribosome profiling experiment.

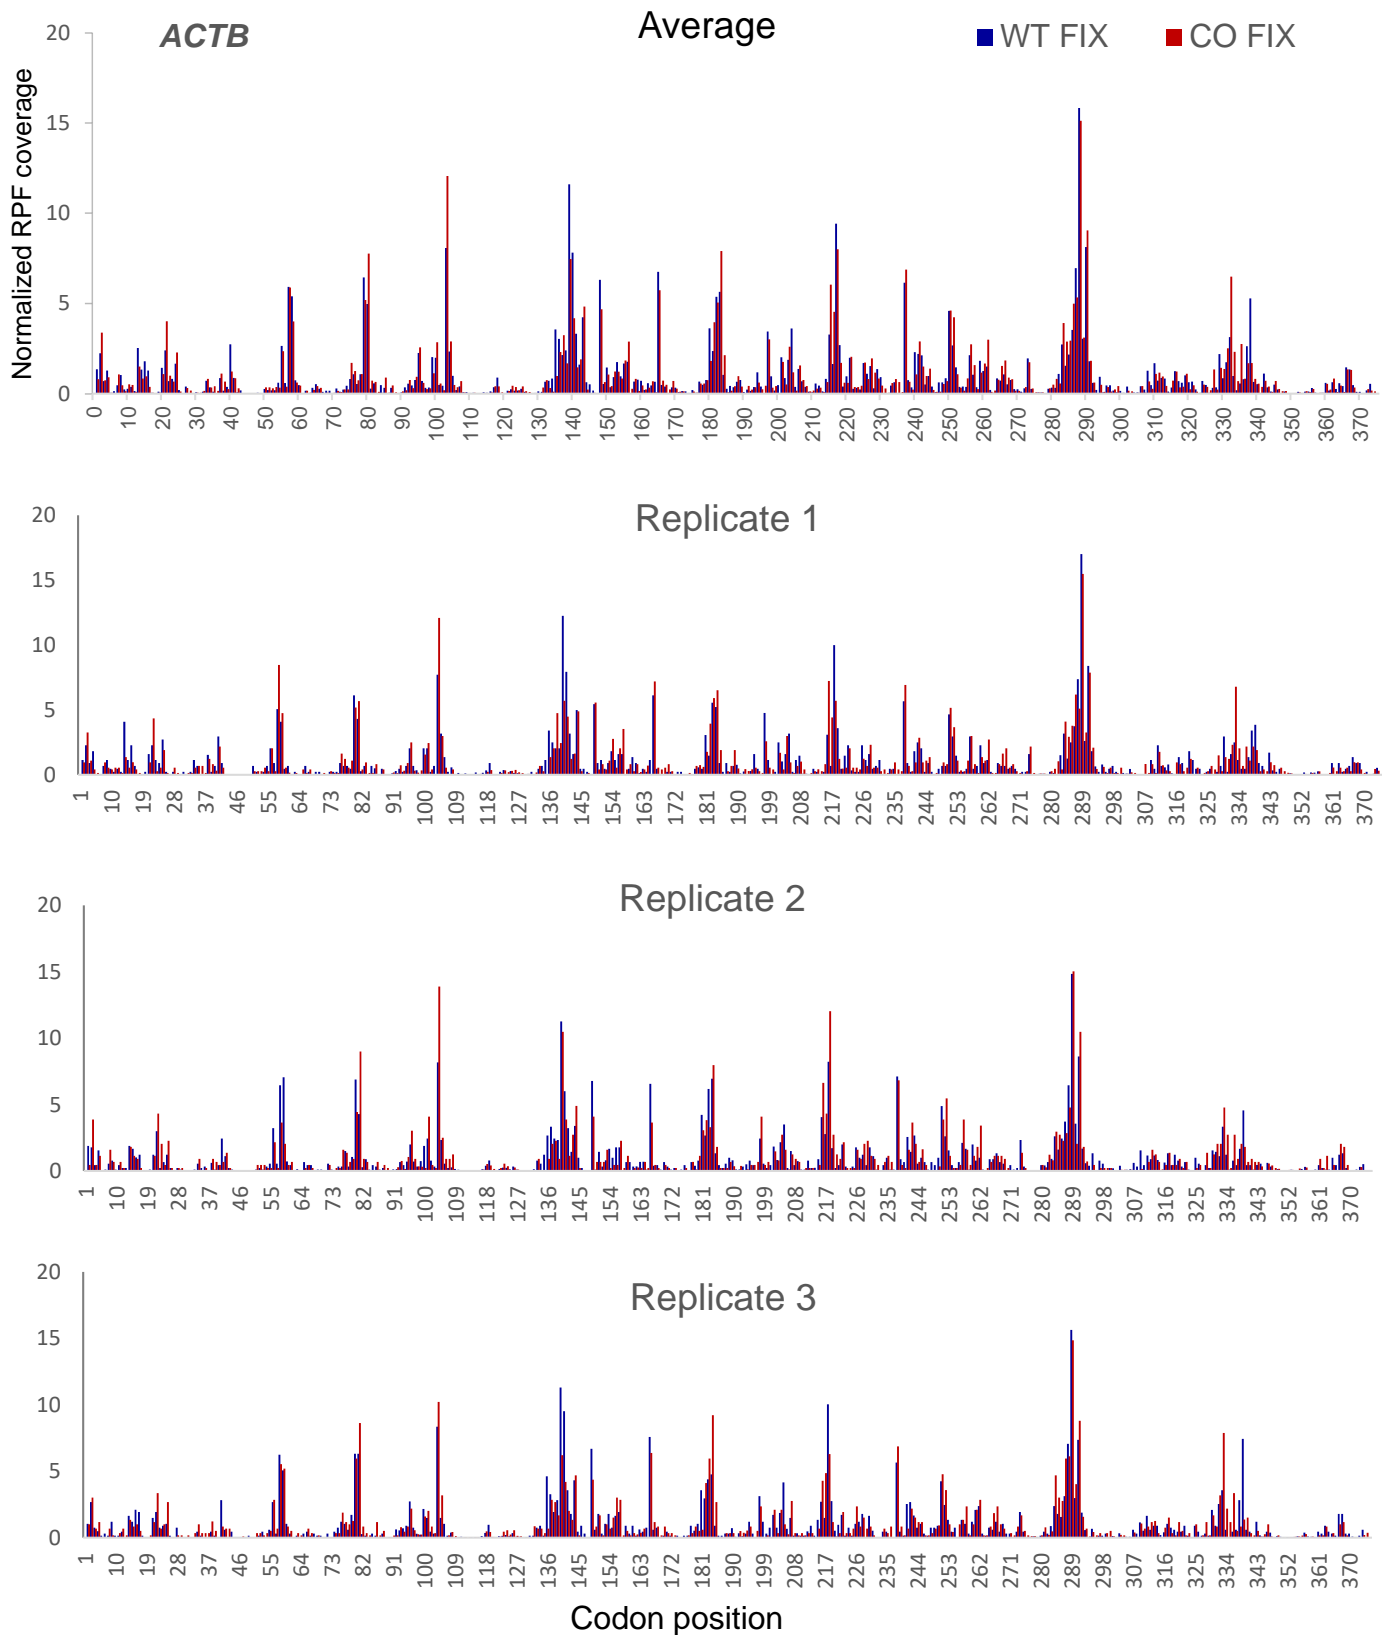

**Supplemental Figure S7. Multiple sets of controls show consistency in ribosome profiling experiments and analysis** (a) Transcript and RPF abundance for *F9*, *GAPDH* and *ACTB* in the WT and CO FIX expressing cell lines. The average of 3 experiments was plotted. (b) RPF size distribution of all reads in the WT and CO FIX expressing cell lines. (c) *F9* RPF size distribution in the WT and CO FIX expressing cell lines. (d) RPF sizes 20-22 and 27-29nt mapped 5'UTR, CDS and 3'UTR regions, (c) triplet periodicity of RPF fragment sizes 20-22 and 27-29 nucleotides, the average of 3 experiments was plotted, s.e.m. are shown.

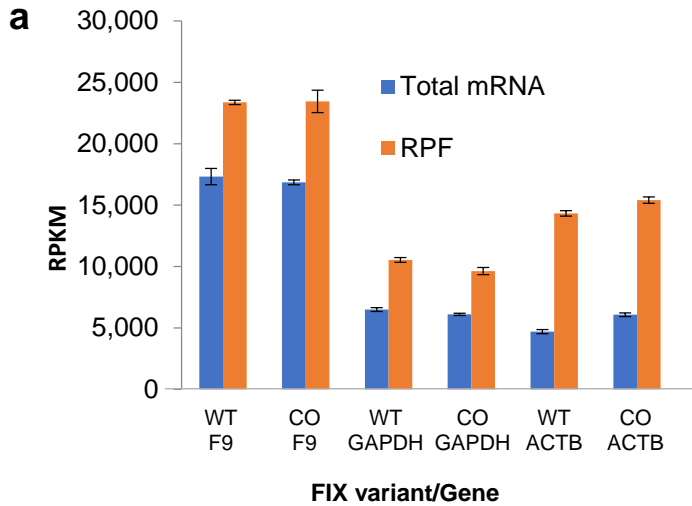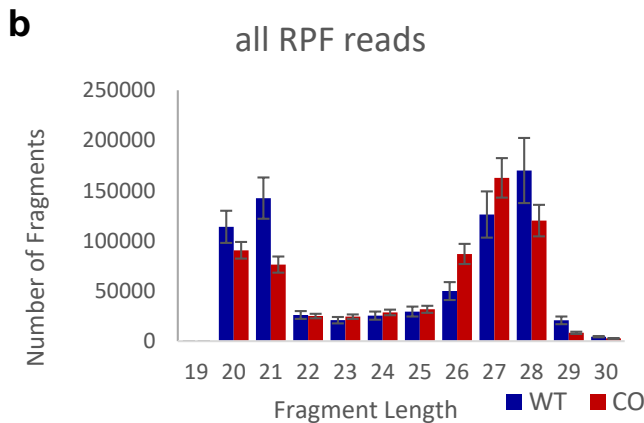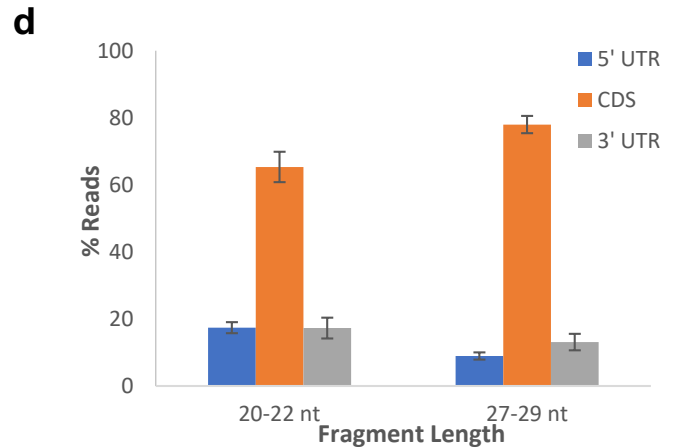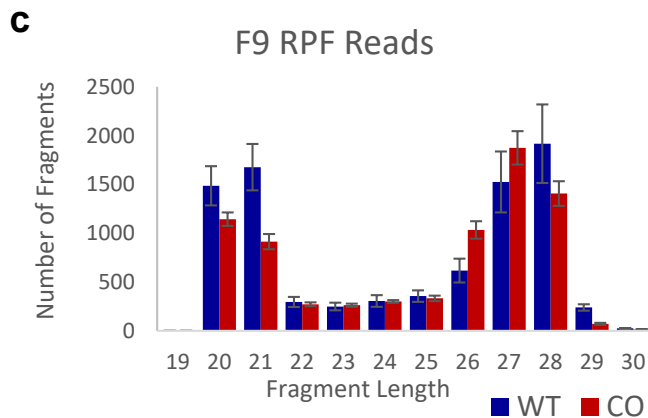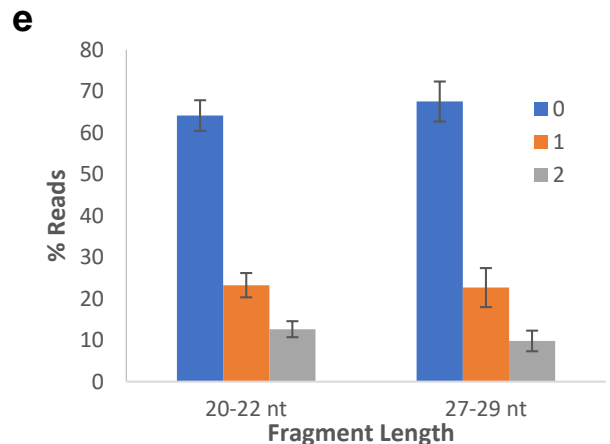



**Supplemental Figure S8. Reproducibility of ribosome profiling experiments.** Pearson's correlation for (a) RPFs and (b) total mRNA between two representative experiments.

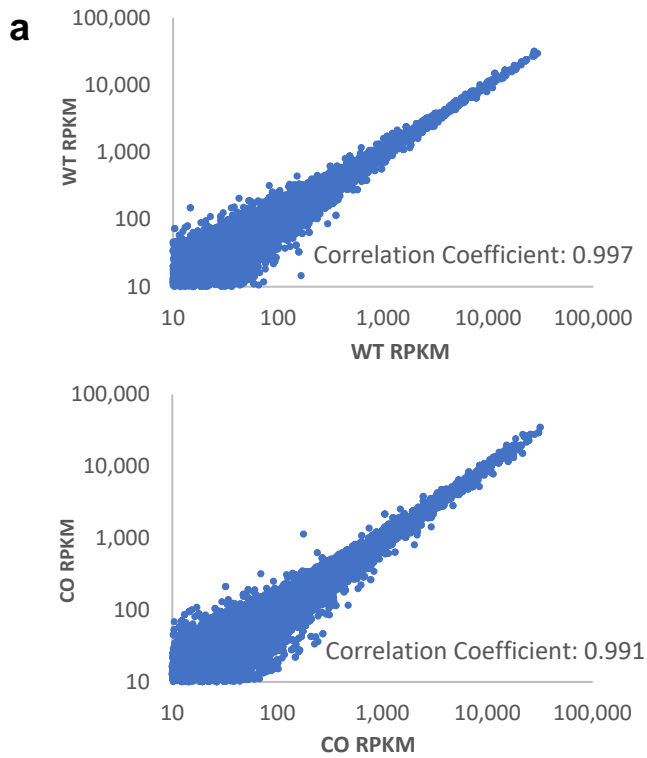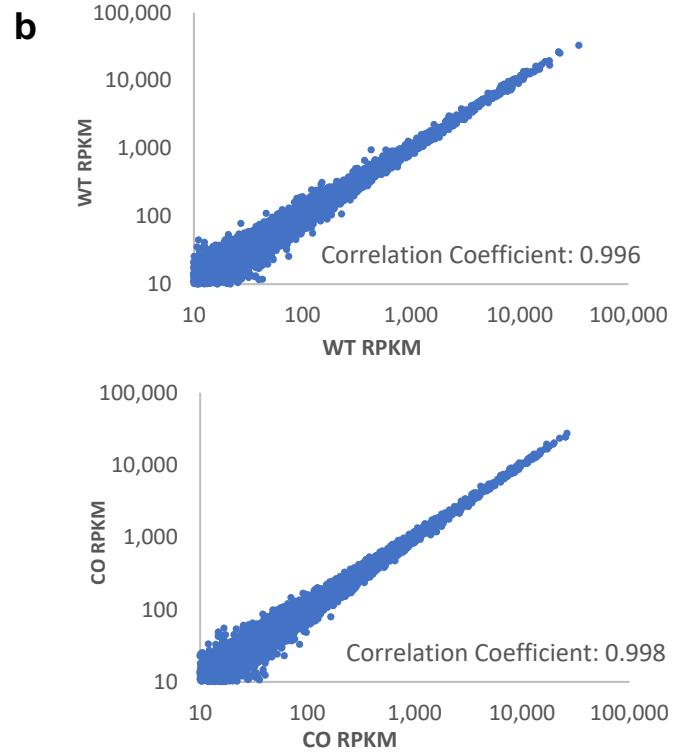

**Supplemental Table 1.** In a multiple linear regression model, the ribosome occupancy of adjacent codons is the only consistently significant predictor of ribosome occupancy of a codon.

|               | Estimate  | Std. Error | t-value | Pr(> t ) | Significance |
|---------------|-----------|------------|---------|----------|--------------|
| <b>WT F9</b>  |           |            |         |          |              |
| (Intercept)   | -1.05664  | 0.50251    | -2.103  | 0.036    | *            |
| RSCU_Genome   | 0.03087   | 0.89716    | 0.034   | 0.9726   |              |
| RSCU_HEK_SRR  | 0.55596   | 1.06783    | 0.521   | 0.6028   |              |
| RSCU_HEK_ERX  | -0.44406  | 1.23987    | -0.358  | 0.7204   |              |
| RSCPU_Genome  | -0.49032  | 0.30636    | -1.6    | 0.1101   |              |
| RSCPU_HEK_SRR | -0.39351  | 0.40322    | -0.976  | 0.3296   |              |
| RSCPU_HEK_ERX | 0.73974   | 0.4682     | 1.58    | 0.1148   |              |
| tRNA          | -4.70107  | 3.00585    | -1.564  | 0.1185   |              |
| MFE_151       | -0.02097  | 0.0105     | -1.997  | 0.0464   | *            |
| Pair-prob     | 0.22075   | 0.16498    | 1.338   | 0.1815   |              |
| Lag3          | 0.05156   | 0.04475    | 1.152   | 0.2498   |              |
| Lag2          | 0.03957   | 0.04945    | 0.8     | 0.4239   |              |
| Lag1          | 0.47339   | 0.04486    | 10.554  | <2e-16   | ***          |
| <b>CO F9</b>  |           |            |         |          |              |
| (Intercept)   | -0.428561 | 0.470664   | -0.911  | 0.362978 |              |
| RSCU_Genome   | 0.987203  | 0.686076   | 1.439   | 0.150808 |              |
| RSCU_HEK_SRR  | -0.510807 | 0.884671   | -0.577  | 0.563933 |              |
| RSCU_HEK_ERX  | -0.562106 | 1.060021   | -0.53   | 0.596157 |              |
| RSCPU_Genome  | -0.100063 | 0.230617   | -0.434  | 0.664555 |              |
| RSCPU_HEK_SRR | 0.012383  | 0.335691   | 0.037   | 0.970589 |              |
| RSCPU_HEK_ERX | 0.119879  | 0.396397   | 0.302   | 0.762458 |              |
| tRNA          | -3.330872 | 2.315622   | -1.438  | 0.150943 |              |
| MFE_151       | -0.007955 | 0.008367   | -0.951  | 0.342211 |              |
| Pair-prob     | -0.130687 | 0.200669   | -0.651  | 0.515183 |              |
| Lag3          | -0.02156  | 0.045746   | -0.471  | 0.637641 |              |
| Lag2          | 0.177367  | 0.048099   | 3.688   | 0.000252 | ***          |
| Lag1          | 0.390892  | 0.045033   | 8.68    | <2e-16   | ***          |
| <b>ACTB</b>   |           |            |         |          |              |
| (Intercept)   | -1.404031 | 0.545822   | -2.572  | 0.0105   | *            |
| RSCU_Genome   | -0.310705 | 0.916587   | -0.339  | 0.7348   |              |
| RSCU_HEK_SRR  | -0.796966 | 1.242992   | -0.641  | 0.5218   |              |
| RSCU_HEK_ERX  | 1.025136  | 1.514433   | 0.677   | 0.4989   |              |
| RSCPU_Genome  | -0.100309 | 0.265983   | -0.377  | 0.7063   |              |
| RSCPU_HEK_SRR | -0.075492 | 0.43977    | -0.172  | 0.8638   |              |
| RSCPU_HEK_ERX | 0.273948  | 0.478317   | 0.573   | 0.5672   |              |
| tRNA          | 1.554097  | 2.632387   | 0.59    | 0.5553   |              |
| MFE_151       | -0.008856 | 0.007942   | -1.115  | 0.2655   |              |
| Pair-prob     | 0.642673  | 0.26481    | 2.427   | 0.0157   | *            |
| Lag3          | 0.107027  | 0.052224   | 2.049   | 0.0411   | *            |
| Lag2          | 0.05047   | 0.057602   | 0.876   | 0.3815   |              |
| Lag1          | 0.442478  | 0.052295   | 8.461   | 6.64E-16 | ***          |
| <b>GAPDH</b>  |           |            |         |          |              |
| (Intercept)   | -0.149095 | 0.462448   | -0.322  | 0.74736  |              |
| RSCU_Genome   | 1.409989  | 0.828001   | 1.703   | 0.08955  | .            |
| RSCU_HEK_SRR  | -1.172997 | 1.265043   | -0.927  | 0.3545   |              |
| RSCU_HEK_ERX  | -0.093217 | 1.421276   | -0.066  | 0.94775  |              |
| RSCPU_Genome  | -0.652895 | 0.287641   | -2.27   | 0.02388  | *            |
| RSCPU_HEK_SRR | -0.4377   | 0.438042   | -0.999  | 0.31844  |              |
| RSCPU_HEK_ERX | 1.113346  | 0.497467   | 2.238   | 0.0259   | *            |
| tRNA          | -2.032467 | 2.679425   | -0.759  | 0.44868  |              |
| MFE_151       | 0.008537  | 0.006816   | 1.252   | 0.2113   |              |
| Pair-prob     | 0.061488  | 0.22621    | 0.272   | 0.78594  |              |
| Lag3          | 0.031727  | 0.05551    | 0.572   | 0.56802  |              |
| Lag2          | 0.179942  | 0.058943   | 3.053   | 0.00246  | **           |
| Lag1          | 0.371884  | 0.056404   | 6.593   | 1.76E-10 | ***          |
